# Supplementary material for: The associations of post-stroke delirium with outcomes: a systematic review and meta-analysis
Source: PubMed Central journal article supplement — BMC Med. 2024 Oct 15;22:470. doi: 10.1186/s12916-024-03689-1 (PMC11475888; doi:10.1186/s12916-024-03689-1), 2024-10-15
Supplement: 12916_2024_3689_MOESM3_ESM.pdf [file 12916_2024_3689_MOESM3_ESM.pdf]

## **eAppendix 1** Search strategy

### *Search terms:*

1. #1 (deliri\* OR confus\* OR confusion\* OR brain syndrome OR brain failure OR Psycho?organic syndrome\* OR organic psycho?yndrome OR toxic confus\* OR alcohol\* psychos?s OR delirium tremens OR withdrawal syndrome) kw,ti,ab
2. #2 (brain vascu\* OR cerebrovascu\* OR cerebral vascu\* OR cerebrovascular disease\* OR cerebrovascular disorder\* OR stroke OR isch?emi\* OR isch?emi\* attack\* OR infarct\* OR intracranial emboli\* OR intracranial thrombo\* OR intracranial h?emorrhag\* OR intracranial bleed\* OR carotid artery disease\* OR intracranial arterial disease\* OR post?stroke OR after stroke OR neurologic\* deficit\* OR TIAOR SAH ORAVM) kw,ti,ab
3. #3 (death OR mortality OR prognos\* OR predict\* OR course OR length of stay OR hospital\* OR stay OR LOS OR institut\* OR cogniti\* OR dysfuncti\* OR cognitive decline OR dement\* OR function\* OR Rankin scale OR quality of life OR indepnden\* OR activit\*) kw,ti,ab
4. #1 AND #2 AND #3

**eAppendix 2** Modified Newcastle-Ottawa Quality Assessment Scale for cohort study

**Selection**

- 1) Representativeness of the exposed cohort
  - a) Truly representative (1 point)
  - b) Somewhat representative (1 point)
  - c) Selected group of users (0 points)
  - d) No description of the derivation of the cohort (0 points)
- 2) Selection of the non-exposed cohort
  - a) Drawn from the same community as the exposed cohort (1 point)
  - b) Drawn from a different source (0 points)
  - c) No description of the derivation of the non-exposed cohort (0 points)
- 3) Ascertainment of exposure
  - a) Secure record (e.g., medical records) (1 point)
  - b) Structured interview (1 point)
  - c) Written self-report (0 points)
  - d) No description (0 points)
  - e) Other (0 points)
- 4) Demonstration that outcome of interest was not present before follow-up
  - a) Yes (1 point)
  - b) No (0 points)

**Comparability and Design<sup>†</sup>**

- 1) Comparability of cohorts on the basis of the design or analysis
  - a) Study controls for two or more covariates (1 point)
  - b) Study controls for less than two covariates (0 points)
- 2) Longitudinal study design
  - a) Prospective longitudinal/cohort study (1 point)
  - b) Retrospective longitudinal/cohort study (0 points)

**Outcome**

**eAppendix 3** Modified Newcastle-Ottawa Quality Assessment Scale for case-control study

- 1) Assessment of outcome
  - a) Independent blind assessment (1 point)
  - b) Record linkage (1 point)
  - c) Self-report (0 points)
  - d) No description (0 points)
  - e) Other (0 points)
- 2) Was follow-up long enough for outcome to occur (at least 1 month)
  - a) Yes (1 point)
  - b) No (0 points)
- 3) Adequacy of follow-up of cohorts
  - a) Complete follow-up – all subjects accounted for (1 point)
  - b) Subjects lost to follow-up unlikely to introduce bias – number lost less than or equal to 20%, or description provided for those lost (1 point)
  - c) Follow-up rate less than 80% and no description of those lost (0 points)
  - d) No statement (0 points)

Notably, a maximum of 9 scores can be awarded to the cohort study: 4 for selection, 3 for outcome, and 2 for comparability. A summary score estimate of 0-3 indicated low quality, 4-6 indicated moderate quality and 7-9 indicated high quality. †Modified for the systematic review.

- 1) Is the case definition adequate?
  - a) yes, with independent validation (1 point)
  - b) yes, eg record linkage or based on selfreports (0 point)
  - c) no description (0 point)
- 2) Representativeness of the cases
  - a) consecutive or obviously representative series of cases (1 point)
  - b) potential for selection biases or not stated (0 point)
- 3) Selection of Controls
  - a) community controls (1 point)
  - b) hospital controls (0 point)
  - c) no description (0 point)
- 4) Definition of Controls
  - a) no history of disease (endpoint) (1 point)
  - b) no description of source (0 point)

### **Comparability**

- 1) Comparability of cases and controls on the basis of the design or analysis
  - a) study controls for age, sex (1 point)
  - b) study controls for any additional factor (1 point)

### **Exposure**

- 1) Ascertainment of exposure
  - a) secure record (eg surgical records) (1 point)
  - b) structured interview where blind to case/control status (1 point)
  - c) interview not blinded to case/control status (0 point)
  - d) written selfreport or medical record only (0 point)
  - e) no description (0 point)
- 2) Same method of ascertainment for cases and controls

a) yes (1 point)

b) no (0 point)

3) Non-Response rate

a) same rate for both groups (1 point)

b) non respondents described (0 point)

c) rate different and no designation (0 point)

Notably, a maximum of 9 scores can be awarded to the cohort study: 4 for selection, 2 for comparability, and 3 for exposure. A summary score estimates of 0-3 indicated low quality, 3-6 indicated moderate quality and 7-9 indicated high quality. †Modified for the systematic review. A study can be awarded a maximum of one star for each numbered item within the Selection and Exposure categories. A maximum of two stars can be given for Comparability.

**eTable 1 Methodological quality for outcomes of poststroke delirium**

| Title                              | Selection       |                             |                       |                        | Comparability                                                       | Exposure               |                                                     |                   | Total |
|------------------------------------|-----------------|-----------------------------|-----------------------|------------------------|---------------------------------------------------------------------|------------------------|-----------------------------------------------------|-------------------|-------|
|                                    | Case definition | Representativeness of cases | Selection of controls | Definition of controls | Comparability of cases and controls on basis of design and analysis | Assessment of exposure | Same method of ascertainment for cases and controls | Non-response rate |       |
| Marielle W.A. van Rijsbergen, 2011 | 1               | 1                           | 1                     | 1                      | 2                                                                   | 1                      | 1                                                   | 0                 | 8     |
| Peter Nydahl, 2017                 | 0               | 1                           | 1                     | 1                      | 2                                                                   | 1                      | 1                                                   | 0                 | 7     |
| Zikrija Dostovic, 2018             | 0               | 1                           | 1                     | 1                      | 2                                                                   | 1                      | 1                                                   | 0                 | 7     |
| Zikrija Dostovic, 2021             | 0               | 1                           | 1                     | 1                      | 2                                                                   | 1                      | 1                                                   | 0                 | 7     |

**Table S1 Characteristics of included studies**

| Author                    | Country                | Setting                             | Center       | Stroke Type                                 | Total Sample, n | Delirium cases, n | Average Age, mean (SD) | Gender (M/F) | Delirium Assessment | Quality Assessment |
|---------------------------|------------------------|-------------------------------------|--------------|---------------------------------------------|-----------------|-------------------|------------------------|--------------|---------------------|--------------------|
| Gustafson et al., 1991    | Sweden                 | Stroke Unit                         | Single       | acute IS or ICH                             | 145             | 69                | 73.0 (10.2)            | 90/55        | DSM-III             | 5                  |
| Henon et al., 1999        | France                 | Stroke Unit                         | Single       | acute IS or ICH                             | 202             | 49                | 75.0 (10.7)            | 97/105       | DSM-IV              | 8                  |
| Caeiro et al., 2004       | Portugal               | Stroke Unit                         | Single       | all Stroke                                  | 218             | 29                | NA                     | 130/88       | DSM-IV/ DRS         | 5                  |
| Sheng et al., 2006        | Australia              | Stroke Unit                         | Single       | acute IS or ICH                             | 156             | 39                | 79.2(6.7)              | 83/73        | DSM-IV              | 8                  |
| Dostovicet al., 2009      | Bosnia and Herzegovina | Neurology                           | single       | acute IS or ICH and SAH                     | 233             | 59                | NA                     | NA           | DSM-IV /DRS-98      | 5                  |
| Manuset al., 2009         | UK                     | Stroke Unit                         | Single       | acute IS or ICH excluding SAH               | 82              | 23                | 66.4 (15.9)            | 51/31        | DSM-III/CAM         | 7                  |
| Dahl MH, 2010             | Norway                 | Stroke Unit                         | Single       | all Stroke                                  | 178             | 18                | 73.0                   | 102/76       | DSM-IV/CAM          | 7                  |
| Memanus et al., 2011      | UK                     | Stroke Unit                         | Single       | acute IS or ICH excluding SAH               | 82              | 23                | 66.4 (15.9)            | 51/31        | DSM-III/CAM         | 9                  |
| Rijsbergen et al., 2011   | Netherlands            | Stroke Unit                         | multi-center | acute IS or ICH excluding SAH               | 122             | 61                | 75.1(10.7)             | 29/21        | CAM                 | 9                  |
| Oldenbeuving et al., 2011 | Netherlands            | Stroke Unit                         | multi-center | acute IS or ICH excluding SAH and TIA       | 527             | 62                | 72(11.2)               | 288/239      | CAM / DRS           | 9                  |
| Miu et al., 2012          | China                  | Stroke Unit                         | Single       | acute IS excluding TIA or ICH               | 314             | 86                | 72.9 (10.3)            | 163/151      | DSM-III/CAM         | 8                  |
| Melkas et al., 2012       | Finland                | Helsinki Stroke Aging Memory Cohort | Single       | acute IS                                    | 263             | 50                | 70.8 (7.4)             | 135/128      | DSM-IV              | 9                  |
| Mitasova et al., 2012     | Czech Republic         | Stroke Unit                         | Single       | acute IS excluding TIA or ICH excluding SAH | 129             | 55                | 71.2 (11.5)            | 72/57        | DSM-IV/ CAM-ICU     | 8                  |
| Naidech et al., 2013      | USA                    | ICU and Stroke Unit                 | Single       | acute ICH                                   | 114             | 31                | 62.4 (13.8)            | 62/52        | DSM-IV/ CAM-ICU     | 8                  |
| Kozak et al., 2016        | Turkey                 | Stroke Unit                         | Single       | acute IS excluding TIA                      | 60              | 11                | 66.2 (12.5)            | 29/31        | DSM-IV/DRS          | 6                  |
| Chan et al., 2017         | Australia              | Stroke Unit                         | Single       | acute IS excluding TIA or ICH excluding SAH | 156             | 39                | 79.2(6.7)              | 83/73        | DSM-IV              | 8                  |
| Rosenthal et al., 2017    | USA                    | Neuro/Spine ICU                     | Single       | acute ICH                                   | 174             | 53                | 63.5                   | 92/82        | CAM-ICU             | 7                  |
| Limet al., 2017           | Korea                  | Stroke Unit                         | Single       | acute IS                                    | 576             | 38                | 65.2 (11.7)            | 368/208      | CAM/ DRS-R-98       | 8                  |

|                       |                        |                                    |        |                                |      |     |             |         |                                 |   |
|-----------------------|------------------------|------------------------------------|--------|--------------------------------|------|-----|-------------|---------|---------------------------------|---|
| Nydahl et al., 2017   | Germany                | Stroke Unit                        | Single | acute IS and ICH including TIA | 309  | 33  | 73.4(4.7)   | NA      | CAM                             | 8 |
| Ojagbemi et al., 2017 | Nigeria                | Neurology Department               | Single | acute IS or ICH                | 99   | 33  | 61.1 (12.9) | 52/47   | CAM/DRS                         | 7 |
| Qu et al., 2018       | China                  | Neurology Department               | Single | acute IS                       | 261  | 38  | 61.3 (12.0) | 184/77  | CAM/DRS                         | 8 |
| Dostovicet al., 2018  | Bosnia and Herzegovina | Neurology Department               | single | acute IS or ICH                | 200  | 100 | NA          | NA      | DSM-IV/ DRS-98                  | 7 |
| Kotfiset al., 2019    | Poland                 | Stroke Unit                        | Single | acute IS                       | 760  | 121 | 71.6(12.5)  | 393/367 | DSM-V/ CAM-ICU                  | 8 |
| Kotfiset al., 2019    | Poland                 | Neurology Department               | Single | acute IS                       | 1001 | 172 | 71.0 (3.0)  | 523/478 | DSM-V/ CAM-ICU                  | 8 |
| Zipseret al., 2019    | Switzerland            | Neurology Department               | Single | all Stroke                     | 1487 | 356 | 71.2 (13.3) | 836/651 | DSM-V/ DOS                      | 5 |
| Pasinska et al., 2019 | Poland                 | Stroke Unit                        | Single | acute IS or ICH including TIA  | 750  | 203 | 71.8 (13.1) | 352/398 | DSM-V / CAM / CAM-ICU           | 9 |
| Zaitoun et al., 2019  | Egypt                  | ICU, Stroke Unit and Neurology     | Single | All Stroke excluding TIA       | 74   | 15  | 60.7 (11.5) | 40/34   | DSM-IV                          | 7 |
| Aizen et al., 2019    | Israel                 | Rehabilitation                     | Single | all Stroke                     | 110  | 30  | 80.2 (8.0)  | 53/57   | CAM/ DRS-R-98                   | 6 |
| Kowalska et al., 2020 | Poland                 | Stroke Unit                        | Single | acute IS or ICH including TIA  | 750  | 203 | 71.8 (13.1) | 352/398 | DSM-V / CAM / CAM-ICU           | 8 |
| Reznik et al., 2021   | USA                    | Neurocritical Care and Stroke Unit | Single | acute ICH                      | 590  | 348 | 70.5 (15.5) | 309/281 | DSM-V                           | 9 |
| Zipseret al., 2021    | Switzerland            | Neurology Department               | Single | all Stroke                     | 567  | 221 | 72.3 (4.2)  | 331/236 | DSM-V/DOS                       | 9 |
| Silva et al., 2021    | Brazil                 | Stroke Unit                        | Single | acute IS or ICH                | 227  | 71  | 62.5 (13.5) | 121/106 | CAM-ICU                         | 9 |
| Czyzycki et al., 2021 | Poland                 | Neurology Department               | Single | acute IS or ICH including TIA  | 688  | 169 | 72.4(5.1)   | 318/370 | CAM / CAM-ICU / DSM-V /DRS-R-98 | 8 |
| Stokholmet al., 2021  | Denmark                | Neurology Department               | Single | acute IS                       | 64   | 8   | 70 (9.8)    | 42/22   | CAM                             | 5 |
| Dostovicet al., 2021  | Croatia                | Neurology                          | Single | acute IS or ICH                | 200  | 100 | NA          | NA      | DRS-R-98                        | 6 |



|                       |        | Department  |              |                               |     |     |             |         |                      |   |
|-----------------------|--------|-------------|--------------|-------------------------------|-----|-----|-------------|---------|----------------------|---|
| Mansutti et al., 2022 | Italy  | Stroke Unit | multi-center | acute IS or ICH               | 78  | 27  | 73.1 (11.5) | 46/32   | 4AT                  | 5 |
| Rollo et al.,2022     | Italy  | Stroke Unit | Single       | acute IS or ICH               | 103 | 36  | 75(3.0)     | 62/41   | RASS / CAM-ICU       | 8 |
| Nerdal et al., 2022   | Norway | Stroke Unit | Multi-center | acute IS or ICH               | 139 | 13  | 71.4 (13.4) | 73/68   | CAM                  | 8 |
| Droś et al., 2023     | Poland | Stroke Unit | Single       | acute IS or ICH including TIA | 750 | 203 | 74 (3.16)   | 352/398 | bCAM/ CAM-ICU/ DSM-V | 9 |

Abbreviations: 4AT: 4 A's Test; bCAM: abbreviated version of the Confusion Assessment Method; CAM: Confusion Assessment Method; CAM-ICU: Confusion Assessment Method of the Intensive Care Unit; CAM-S: Confusion Assessment Method of Severity; DOS: Delirium Observation Screening; DRS: Delirium Rating Scale; DSM: Diagnostic and Statistical Manual of Mental Disorders; ICH: intracranial cerebral hemorrhage; ICU: Intensive Care Unit; IS: ischemic stroke; NA = not available; RASS: Richmond Agitation Sedation Scale; SAH: subarachnoid hemorrhage; TIA: transient ischemic attack; USA: United States of America; UK: United Kingdom

**Table S2 Methodological quality for outcomes of poststroke delirium**

| Title                              | Selection          |               |                           |                         | Comparability       |            | Outcome               |           |                                  | Total |
|------------------------------------|--------------------|---------------|---------------------------|-------------------------|---------------------|------------|-----------------------|-----------|----------------------------------|-------|
|                                    | Representativeness | Control group | Ascertainment of exposure | Outcome not at baseline | Adjusted Covariates | Study type | Assessment of outcome | Follow-up | Adequacy of follow-up of cohorts |       |
| Yngve Gustafson, 1991              | 1                  | 1             | 1                         | 0                       | 0                   | 1          | 1                     | 0         | 0                                | 5     |
| H. Henon, 1999                     | 1                  | 1             | 1                         | 1                       | 0                   | 1          | 1                     | 1         | 1                                | 8     |
| Lara Caeiro, 2004                  | 1                  | 1             | 1                         | 0                       | 0                   | 1          | 1                     | 0         | 0                                | 5     |
| Ai Zhen Sheng, 2006                | 1                  | 1             | 1                         | 1                       | 0                   | 1          | 1                     | 1         | 1                                | 8     |
| Zikrija Dostovic, 2009             | 1                  | 1             | 1                         | 0                       | 0                   | 1          | 1                     | 0         | 0                                | 5     |
| John Mc Manus, 2009                | 1                  | 1             | 1                         | 0                       | 0                   | 1          | 1                     | 1         | 1                                | 7     |
| Dahl MH, 2010                      | 1                  | 1             | 1                         | 0                       | 0                   | 1          | 1                     | 1         | 1                                | 7     |
| JOHNT.MCMANUS, 2011                | 1                  | 1             | 1                         | 1                       | 1                   | 1          | 1                     | 1         | 1                                | 9     |
| Marielle W.A. van Rijsbergen, 2011 | 1                  | 1             | 1                         | 1                       | 1                   | 1          | 1                     | 1         | 1                                | 9     |
| A.W. Oldenbeuving, 2011            | 1                  | 1             | 1                         | 1                       | 1                   | 1          | 1                     | 1         | 1                                | 9     |
| Doris Ka Ying Miu, 2012            | 1                  | 1             | 1                         | 1                       | 1                   | 1          | 1                     | 1         | 0                                | 8     |
| Susanna Melkas, 2012               | 1                  | 1             | 1                         | 1                       | 1                   | 1          | 1                     | 1         | 1                                | 9     |
| Adela Mitasova, 2012               | 1                  | 1             | 1                         | 1                       | 1                   | 1          | 1                     | 1         | 0                                | 8     |
| Andrew M. Naidech, 2013            | 1                  | 1             | 1                         | 1                       | 1                   | 1          | 1                     | 1         | 0                                | 8     |
| Hasan Huseyin Kozak, 2016          | 1                  | 1             | 1                         | 1                       | 0                   | 1          | 1                     | 0         | 0                                | 6     |
| Eunice Kar Wing Chan, 2017         | 1                  | 1             | 1                         | 1                       | 0                   | 1          | 1                     | 1         | 1                                | 8     |
| Lisa J. Rosenthal, 2017            | 1                  | 1             | 1                         | 0                       | 0                   | 1          | 1                     | 1         | 1                                | 7     |
| Tae Sung Lim, 2017                 | 1                  | 1             | 1                         | 1                       | 0                   | 1          | 1                     | 1         | 1                                | 8     |
| Peter Nydahl, 2017                 | 1                  | 1             | 1                         | 1                       | 0                   | 1          | 1                     | 1         | 1                                | 8     |
| Akin Ojagbemi, 2017                | 1                  | 1             | 1                         | 1                       | 0                   | 1          | 1                     | 1         | 0                                | 7     |
| Jianfeng Qu, 2018                  | 1                  | 1             | 1                         | 1                       | 0                   | 1          | 1                     | 1         | 1                                | 8     |

|                               |   |   |   |   |   |   |   |   |   |   |
|-------------------------------|---|---|---|---|---|---|---|---|---|---|
| Zikrija Dostovic, 2018        | 1 | 1 | 1 | 1 | 0 | 1 | 1 | 1 | 0 | 7 |
| Katarzyna Kotfis, 2019        | 1 | 1 | 1 | 1 | 0 | 1 | 1 | 1 | 1 | 8 |
| Katarzyna Kotfis, 2019        | 1 | 1 | 1 | 1 | 0 | 1 | 1 | 1 | 1 | 8 |
| Carl Moritz Zipser, 2019      | 1 | 1 | 1 | 0 | 0 | 1 | 1 | 0 | 0 | 5 |
| Paulina Pasinska, 2019        | 1 | 1 | 1 | 1 | 1 | 1 | 1 | 1 | 1 | 9 |
| A. M. Zaitoun, 2019           | 1 | 1 | 1 | 1 | 0 | 1 | 1 | 1 | 0 | 7 |
| EfraimAizen, 2019             | 1 | 1 | 1 | 0 | 0 | 1 | 1 | 1 | 0 | 6 |
| Katarzyna Kowalska, 2020      | 1 | 1 | 1 | 1 | 0 | 1 | 1 | 1 | 1 | 8 |
| Michael E. Reznik, 2021       | 1 | 1 | 1 | 1 | 1 | 1 | 1 | 1 | 1 | 9 |
| Carl Moritz Zipser, 2021      | 1 | 1 | 1 | 1 | 1 | 1 | 1 | 1 | 1 | 9 |
| Ivã Taiuan Fialho Silva, 2021 | 1 | 1 | 1 | 1 | 1 | 1 | 1 | 1 | 1 | 9 |
| Mateusz Czyzycki, 2021        | 1 | 1 | 1 | 1 | 1 | 1 | 1 | 1 | 0 | 8 |
| Jannik Stokholm, 2021         | 1 | 1 | 1 | 0 | 0 | 1 | 1 | 0 | 0 | 5 |
| Zikrija Dostovic, 2021        | 1 | 1 | 1 | 1 | 0 | 1 | 1 | 0 | 0 | 6 |
| Irene Mansutti, 2022          | 1 | 1 | 1 | 0 | 0 | 1 | 1 | 0 | 0 | 5 |
| Eleonora Rollo, 2022          | 1 | 1 | 1 | 1 | 0 | 1 | 1 | 1 | 1 | 8 |
| Vilde Nerdal, 2022            | 1 | 1 | 1 | 1 | 0 | 1 | 1 | 1 | 1 | 8 |
| Jakub Droś, 2023              | 1 | 1 | 1 | 1 | 1 | 1 | 1 | 1 | 1 | 9 |

Note: A maximum of 9 scores can be awarded to the cohort study: 4 for selection, 3 for outcome, and 2 for comparability. A summary score estimate of 0-3 indicated low quality, 4-6 indicated moderate quality and 7-9 indicated high quality.

**Table S3 The meta-analysis of outcomes for post-stroke delirium with excluding outliers**

| Outcomes                     | No.of Outliers Studies | Random Effect (95% CI) |                        | p-value        | Q-value,p-value, I <sup>2</sup> | P-value for Egger's regression |
|------------------------------|------------------------|------------------------|------------------------|----------------|---------------------------------|--------------------------------|
|                              |                        | Pooled OR              | Pooled SMD             |                |                                 |                                |
| <b>Mortality</b>             | 3                      | 5.13 (4.10-6.42)       |                        | < <b>0.001</b> | 33.41, 0.056, 34.16             | 0.92                           |
| <b>LoS</b>                   | 8                      |                        | 0.60 (0.47 to 0.72)    | < <b>0.001</b> | 26.01, 0.006, 57.71             | 0.19                           |
| <b>Institutionalization</b>  | 2                      | 4.15 (2.95-5.84)       |                        | < <b>0.001</b> | 22.10, 0.005, 63.81             | 0.70                           |
| <b>Cognitive impairment</b>  |                        |                        |                        |                |                                 |                                |
| Continuous                   | 1                      |                        | -1.10 (-1.50 to -0.70) | < <b>0.001</b> | 3.76, 0.152, 46.83              | 0.92                           |
| <b>Modified Rankin Scale</b> |                        |                        |                        |                |                                 |                                |
| Continuous                   | 6                      |                        | 2.45 (0.22 to 4.69)    | <b>0.031</b>   | 252.96, P < 0.001, 98.81        | 0.11                           |
| <b>Quality of life</b>       |                        |                        |                        |                |                                 |                                |
| Continuous                   | 1                      |                        | -1.52 (-2.41 to -0.63) | <b>0.001</b>   | 187.96, P < 0.001, 96.80        | 0.81                           |

Boldface type indicates statistical significance with two-sided  $p < 0.05$ .

Abbreviations: CI: confidence interval; LoS: length of stay; OR: odds ratio; SMD: standardized mean difference

**Table S4** Uni- and multivariable Meta-regression for heterogeneity-originated covariates of outcomes

| Outcomes                                   | Univariable |      |                |         |              |                    | Multivariable |         |              |                    |
|--------------------------------------------|-------------|------|----------------|---------|--------------|--------------------|---------------|---------|--------------|--------------------|
|                                            | $\beta$     | SE   | 95% CI         | z-value | p-value      | R <sup>2</sup> (%) | $\beta$       | z-value | p-value      | R <sup>2</sup> (%) |
| <b>Mortality</b>                           |             |      |                |         |              |                    |               |         |              |                    |
| Age at Baseline, y                         | -0.03       | 0.03 | -0.10 to 0.03  | -1.09   | 0.276        | 0                  |               |         |              |                    |
| NIHSS                                      | -0.03       | 0.07 | -0.18 to 0.10  | -0.52   | 0.606        | 0                  |               |         |              |                    |
| <b>Measure of Delirium</b>                 |             |      |                |         | 0.557        | 0                  |               |         |              |                    |
| CAM                                        | Ref.        | -    | -              | -       | -            |                    |               |         |              |                    |
| DSM                                        | -0.28       | 0.57 | -1.42 to 0.84  | -0.49   | 0.621        |                    |               |         |              |                    |
| Other                                      | 1.25        | 1.66 | -2.01 to 4.53  | 0.75    | 0.450        |                    |               |         |              |                    |
| Mix                                        | 0.20        | 0.47 | -0.73 to 1.13  | 0.42    | 0.676        |                    |               |         |              |                    |
| <b>Stroke Type</b>                         |             |      |                |         |              | 10.0               |               |         |              |                    |
| ICH                                        | Ref.        | -    | -              | -       | -            |                    | Ref.          | -       | -            |                    |
| IS                                         | -1.69       | 0.90 | -3.47 to -0.08 | -1.87   | 0.061        |                    | -1.01         | -1.07   | 0.284        | 16                 |
| IS and ICH                                 | -1.95       | 0.87 | -3.67 to -0.24 | -2.24   | <b>0.025</b> |                    | -1.51         | -1.70   | 0.089        |                    |
| <b>Neuropsychiatric Disorders Excluded</b> |             |      |                |         |              | 0                  |               |         |              |                    |
| No                                         | Ref.        | -    | -              | -       | -            |                    |               |         |              |                    |
| Yes                                        | -0.07       | 0.29 | -0.65 to 0.51  | -0.24   | 0.808        |                    |               |         |              |                    |
| <b>Duration of Follow-up, m</b>            |             |      |                |         |              | 1.0                |               |         |              |                    |
| < 3                                        | Ref.        | -    | -              | -       | -            |                    | Ref.          | -       | -            |                    |
| ≥ 3                                        | -0.69       | 0.30 | -1.29 to -0.09 | -2.26   | <b>0.023</b> |                    | -0.69         | -2.18   | <b>0.029</b> |                    |
| <b>NOS scores</b>                          | -0.10       | 0.11 | -0.33 to 0.13  | -0.86   | 0.390        | 0                  |               |         |              |                    |
| <b>LoS</b>                                 |             |      |                |         |              |                    |               |         |              |                    |
| Age at Baseline, y                         | -0.03       | 0.04 | -0.11 to 0.05  | -0.74   | 0.458        | 0                  |               |         |              |                    |
| NIHSS                                      | -0.08       | 0.08 | -0.25 to 0.08  | -0.99   | 0.324        | 0                  |               |         |              |                    |
| <b>Measure of Delirium</b>                 |             |      |                |         | 0.218        | 0                  |               |         |              |                    |
| CAM                                        | Ref.        | -    | -              | -       | -            |                    |               |         |              |                    |
| DSM                                        | -0.98       | 0.70 | -2.36 to 0.39  | -1.40   | 0.161        |                    |               |         |              |                    |
| Other                                      | -1.40       | 0.99 | -3.36 to 0.55  | -1.41   | 0.159        |                    |               |         |              |                    |
| Mix                                        | -0.14       | 0.55 | -1.23 to 0.95  | -0.25   | 0.801        |                    |               |         |              |                    |
| <b>Stroke Type</b>                         |             |      |                |         | <b>0.004</b> | 37                 |               |         | <b>0.012</b> |                    |
| ICH                                        | Ref.        | -    | -              | -       | -            |                    | Ref.          | -       | -            | 41                 |

|                                            |       |      |                |       |                |     |       |       |                |    |
|--------------------------------------------|-------|------|----------------|-------|----------------|-----|-------|-------|----------------|----|
| IS                                         | -1.81 | 0.57 | -2.94 to -0.68 | -3.14 | <b>0.001</b>   |     | -1.62 | -2.79 | <b>0.005</b>   |    |
| IS and ICH                                 | -1.60 | 0.52 | -2.62 to -0.58 | -3.09 | <b>0.002</b>   |     | -1.48 | -2.83 | <b>0.004</b>   |    |
| <b>Neuropsychiatric Disorders Excluded</b> |       |      |                |       |                | 5   |       |       |                |    |
| No                                         | Ref.  | -    | -              | -     | -              |     | Ref.  | -     | -              |    |
| Yes                                        | 0.50  | 0.53 | -0.53 to 1.54  | 0.95  | 0.340          |     | 0.96  | 2.18  | <b>0.029</b>   |    |
| <b>NOS scores</b>                          | 0.27  | 0.13 | 0.01 to 0.53   | 2.11  | <b>0.035</b>   | 4   | 0.25  | 2.29  | <b>0.022</b>   |    |
| <b>Institutionalization</b>                |       |      |                |       |                |     |       |       |                |    |
| <b>Age at Baseline, y</b>                  | -0.01 | 0.06 | -0.13 to 0.10  | -0.30 | 0.760          | 0   |       |       |                |    |
| <b>NIHSS</b>                               | -0.01 | 0.15 | -0.31 to 0.28  | -0.10 | 0.920          | 0   |       |       |                |    |
| <b>Measure of Delirium</b>                 |       |      |                |       | 0.830          | 0   |       |       |                |    |
| DSM                                        | Ref.  | -    | -              | -     | -              |     |       |       |                |    |
| Other                                      | -0.59 | 0.98 | -2.52 to 1.34  | -0.60 | 0.550          |     |       |       |                |    |
| Mix                                        | -0.12 | 0.62 | -1.34 to 1.09  | -0.21 | 0.836          |     |       |       |                |    |
| <b>Stroke Type</b>                         |       |      |                |       | < <b>0.001</b> | 100 |       |       | < <b>0.001</b> |    |
| ICH                                        | Ref.  | -    | -              | -     | -              |     | Ref.  | -     | -              |    |
| IS                                         | -2.84 | 0.73 | -4.28 to -1.39 | -3.86 | < <b>0.001</b> |     | -2.84 | -3.86 | < <b>0.001</b> |    |
| IS and ICH                                 | -1.75 | 0.72 | -3.18 to -0.32 | -2.40 | <b>0.016</b>   |     | -1.75 | -2.40 | <b>0.016</b>   |    |
| <b>Neuropsychiatric Disorders Excluded</b> |       |      |                |       |                | 0   |       |       |                |    |
| No                                         | Ref.  | -    | -              | -     | -              |     |       |       |                |    |
| Yes                                        | 0.43  | 0.45 | -0.46 to 1.33  | 0.95  | 0.340          |     |       |       |                |    |
| <b>NOS scores</b>                          | 0.06  | 0.17 | -0.28 to 0.41  | 0.34  | 0.732          | 0   |       |       |                |    |
| <b>Cognitive Decline</b>                   |       |      |                |       |                |     |       |       |                |    |
| <b>Measure of Delirium</b>                 |       |      |                |       |                | 97  |       |       |                |    |
| CAM                                        | Ref.  | -    | -              | -     | -              |     | Ref.  | -     | -              | 97 |
| DSM                                        | 6.00  | 0.77 | 4.48 to 7.51   | 7.75  | < <b>0.001</b> |     | 6.00  | 7.75  | < <b>0.001</b> |    |
| <b>Functional Outcome</b>                  |       |      |                |       |                |     |       |       |                |    |
| <b>Age at Baseline, y</b>                  | 0.21  | 0.23 | -0.24 to 0.66  | 0.90  | 0.367          | 0   |       |       |                |    |
| <b>NIHSS</b>                               | -0.13 | 0.34 | -0.81 to 0.55  | -0.37 | 0.709          | 0   |       |       |                |    |
| <b>Measure of Delirium</b>                 |       |      |                |       | 0.613          | 0   |       |       |                |    |
| CAM                                        | Ref.  | -    | -              | -     | -              |     |       |       |                |    |
| DSM                                        | -0.14 | 4.39 | -8.75 to 8.45  | -0.03 | 0.972          |     |       |       |                |    |
| Other                                      | 0.54  | 4.39 | -8.06 to 9.16  | 0.12  | 0.900          |     |       |       |                |    |
| Mix                                        | 2.98  | 3.32 | -3.53 to 9.50  | 0.90  | 0.368          |     |       |       |                |    |

|                                            |       |      |                 |       |                |    |       |       |                |
|--------------------------------------------|-------|------|-----------------|-------|----------------|----|-------|-------|----------------|
| <b>Stroke Type</b>                         |       |      |                 |       | 0.482          | 0  |       |       |                |
| ICH                                        | Ref.  | -    | -               | -     | -              |    |       |       |                |
| IS                                         | -3.10 | 2.58 | -8.16 to 1.95   | -1.20 | 0.229          |    |       |       |                |
| IS and ICH                                 | -1.84 | 2.58 | -6.90 to -3.21  | -0.72 | 0.474          |    |       |       |                |
| <b>Neuropsychiatric Disorders Excluded</b> |       |      |                 |       |                | 0  |       |       |                |
| No                                         | Ref.  | -    | -               | -     | -              |    |       |       |                |
| Yes                                        | 0.42  | 2.06 | -3.61 to -4.46  | 0.21  | 0.836          |    |       |       |                |
| <b>Duration of Follow-up, m</b>            |       |      |                 |       |                | 0  |       |       |                |
| < 3                                        | Ref.  | -    | -               | -     | -              |    |       |       |                |
| ≥ 3                                        | -0.26 | 2.43 | -5.04 to 4.51   | -0.11 | 0.913          |    |       |       |                |
| <b>NOS scores</b>                          | 1.06  | 0.59 | -0.11 to 2.23   | 1.77  | 0.076          | 14 | 1.06  | 1.77  | 0.076          |
| <b>Quality of Life</b>                     |       |      |                 |       |                |    |       |       |                |
| <b>Age at Baseline, y</b>                  | -0.00 | 0.17 | -0.34 to 0.32   | -0.05 | 0.961          | 0  |       |       |                |
| <b>NIHSS</b>                               | -1.23 | 1.20 | -3.58 to 1.12   | -0.10 | 0.306          | 0  |       |       |                |
| <b>Measure of Delirium</b>                 |       |      |                 |       | 0.548          | 0  |       |       |                |
| DSM                                        | Ref.  | -    | -               | -     | -              |    |       |       |                |
| Other                                      | -0.14 | 3.48 | -6.97 to 6.67   | -0.04 | 0.966          |    |       |       |                |
| Mix                                        | -2.36 | 2.30 | -6.88 to 2.14   | -1.03 | 0.303          |    |       |       |                |
| <b>Stroke Type</b>                         |       |      |                 |       |                | 0  |       |       |                |
| IS                                         |       |      |                 |       |                |    |       |       |                |
| IS and ICH                                 | -2.46 | 3.03 | -8.41 to 3.48   | -0.81 | 0.417          |    |       |       |                |
| <b>Measure Tools</b>                       |       |      |                 |       | < <b>0.001</b> | 79 |       |       | < <b>0.001</b> |
| BI                                         | Ref.  | -    | -               | -     | -              |    | Ref.  | -     | -              |
| FIM                                        | 0.63  | 1.06 | -1.44 to 2.70   | 0.59  | 0.551          |    | 0.53  | 0.48  | 0.629          |
| IADL                                       | -8.15 | 1.39 | -10.89 to -5.41 | -5.84 | < <b>0.001</b> |    | -7.77 | -4.97 | < <b>0.001</b> |
| <b>NOS scores</b>                          | -1.10 | 0.69 | -2.47 to 0.25   | -1.60 | 0.110          | 8  | -0.24 | -0.62 | 0.534          |

79

Boldface type indicates statistical significance with two-sided  $p < 0.05$ .

Abbreviations: BI: Barthel Index; CAM: Confusion Assessment Method; CAM: Confusion Assessment Method; CI: confidence interval; DSM: Diagnostic and Statistical Manual of Mental Disorders; FIM: Functional Independence Measure; IADL: Instrumental Activities of Daily Living; ICH: intracranial cerebral hemorrhage; IS: ischemic stroke; LoS: length of stay; NA = not available; NIHSS: National Institute of Health stroke scale; m: month; RASS: Richmond Agitation Sedation Scale; Ref.: reference; SAH: subarachnoid hemorrhage; TIA: transient ischemic attack; USA: United States of America; UK: United Kingdom; y, year

**Table S5 Sensitivity analysis**

| Outcomes                                         | Adjusting Level         | No. of Studies | Effect Size (95% CI)   | p-value        | Q-value,p-value, I <sup>2</sup> | p-value for Egger's Regression |
|--------------------------------------------------|-------------------------|----------------|------------------------|----------------|---------------------------------|--------------------------------|
| <b>Sensitivity Analysis</b>                      |                         |                |                        |                |                                 |                                |
| <b>Mortality</b>                                 | unadjusted, OR          | 18             | 4.22 (3.07 to 5.79)    | < <b>0.001</b> | 51.90, < <b>0.001</b> , 67.25   | 0.49                           |
|                                                  | inadequate Adjusted, OR | 4              | 3.27 (1.47 to 7.27)    | <b>0.004</b>   | 7.64, 0.05, 60.74               | 0.15                           |
| <b>LoS</b>                                       | unadjusted, SMD         | 19             | 1.21 (0.54 to 1.88) *  | < <b>0.001</b> | 1520.54, < <b>0.001</b> , 98.81 | < <b>0.001</b>                 |
| <b>Institutionalization</b>                      | unadjusted, OR          | 7              | 4.43 (2.20 to 8.91)    | < <b>0.001</b> | 41.58, < <b>0.001</b> , 85.57   | 0.02                           |
| <b>Cognitive Decline</b>                         | unadjusted, OR          | 4              | 9.21 (5.35 to 15.85)   | < <b>0.001</b> | 1.21, 0.74, 0.00                | 0.24                           |
|                                                  | unadjusted, SMD         | 1              | -1.27 (-1.67 to -0.87) | < <b>0.001</b> | 0.00, 1.00, 0.00                | -                              |
| <b>Dementia</b>                                  | unadjusted, OR          | 2              | 9.45 (3.57 to 24.98)   | < <b>0.001</b> | 0.43, 0.51, 0.00                | -                              |
| <b>Poor functional outcomes</b>                  | unadjusted, OR          | 2              | 4.78 (2.95 to 7.76)    | < <b>0.001</b> | 0.44, 0.50, 0.00                | -                              |
|                                                  | unadjusted, SMD         | 5              | 2.07 (-0.09 to 4.24)   | 0.06           | 488.07, < <b>0.001</b> , 99.18  | 0.90                           |
|                                                  | inadequate Adjusted, OR | 2              | 4.16 (1.69 to 10.21)   | <b>0.002</b>   | 0.84, 0.35, 0.00                | -                              |
|                                                  | adequate Adjusted, OR   | 2              | 4.16 (1.69 to 10.21)   | <b>0.002</b>   | 0.84, 0.35, 0.00                | -                              |
| <b>Poor Quality of Life</b>                      | unadjusted, SMD         | 6              | -2.97 (-5.41 to -0.53) | <b>0.017</b>   | 1030.85, < <b>0.001</b> , 99.51 | 0.42                           |
| <b>Sensitivity Analysis — Excluding Outliers</b> |                         |                |                        |                |                                 |                                |
| <b>Mortality</b>                                 | unadjusted, OR          | 3              | 5.13 (4.10 to 6.42)    | < <b>0.001</b> | 33.41, 0.056, 34.16             | 0.92                           |
| <b>LoS</b>                                       | unadjusted, SMD         | 8              | 0.60 (0.47 to 0.72)    | < <b>0.001</b> | 26.01, <b>0.006</b> , 57.71     | 0.19                           |
| <b>Institutionalization</b>                      | unadjusted, OR          | 2              | 4.15 (2.95 to 5.84)    | < <b>0.001</b> | 22.10, <b>0.005</b> , 63.81     | 0.70                           |
| <b>Cognitive Decline</b>                         | unadjusted, SMD         | 1              | -1.10 (-1.50 to -0.70) | < <b>0.001</b> | 3.76, 0.152, 46.83              | 0.92                           |
| <b>Poor functional outcomes</b>                  | unadjusted, SMD         | 6              | 2.45 (0.22 to 4.69)    | 0.031          | 252.96, < <b>0.001</b> , 98.81  | 0.11                           |
| <b>Poor Quality of Life</b>                      | unadjusted, SMD         | 1              | -1.52 (-2.41 to -0.63) | <b>0.001</b>   | 187.96, < <b>0.001</b> , 96.80  | 0.81                           |

Boldface type indicates statistical significance with two-sided  $p < 0.05$ .

\*Pooled effect size was adjusted by the trim-and-filled method.

Abbreviations: CI: confidence interval; LoS: length of stay; OR: odds ratio; SMD: standardized mean difference



Figure S1 Funnel plot assessing publication bias on mortality of post-stroke delirium

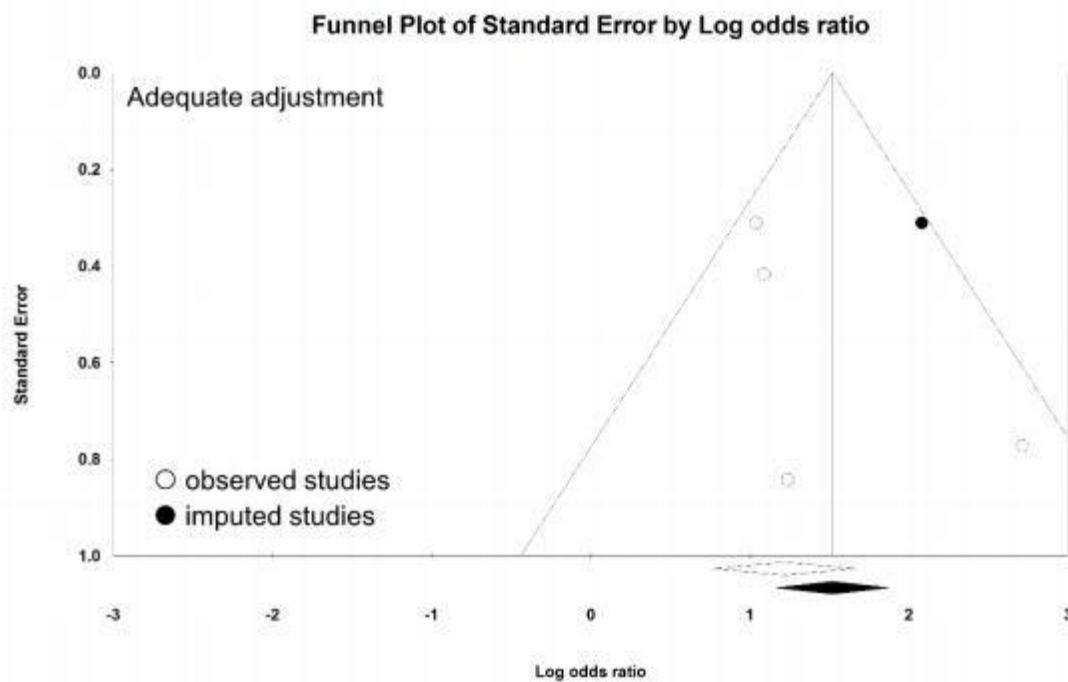

The adjusted pooled odd ratio (OR) was 4.72 with a 95% confidence interval ranging from 2.57-8.67, after simulation of 1 missing study using the trim-and-filled method.

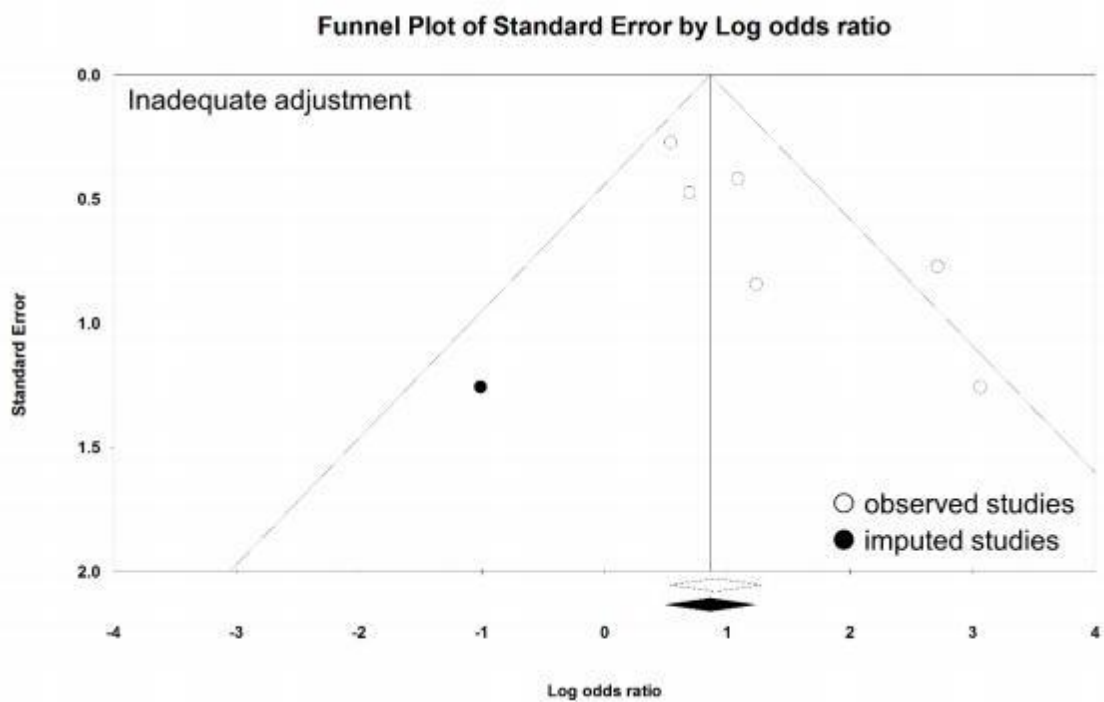

The adjusted pooled odd ratio (OR) was 2.92 with a 95% confidence interval ranging from 1.51-5.64, after simulation of 1 missing study using the trim-and-filled method.

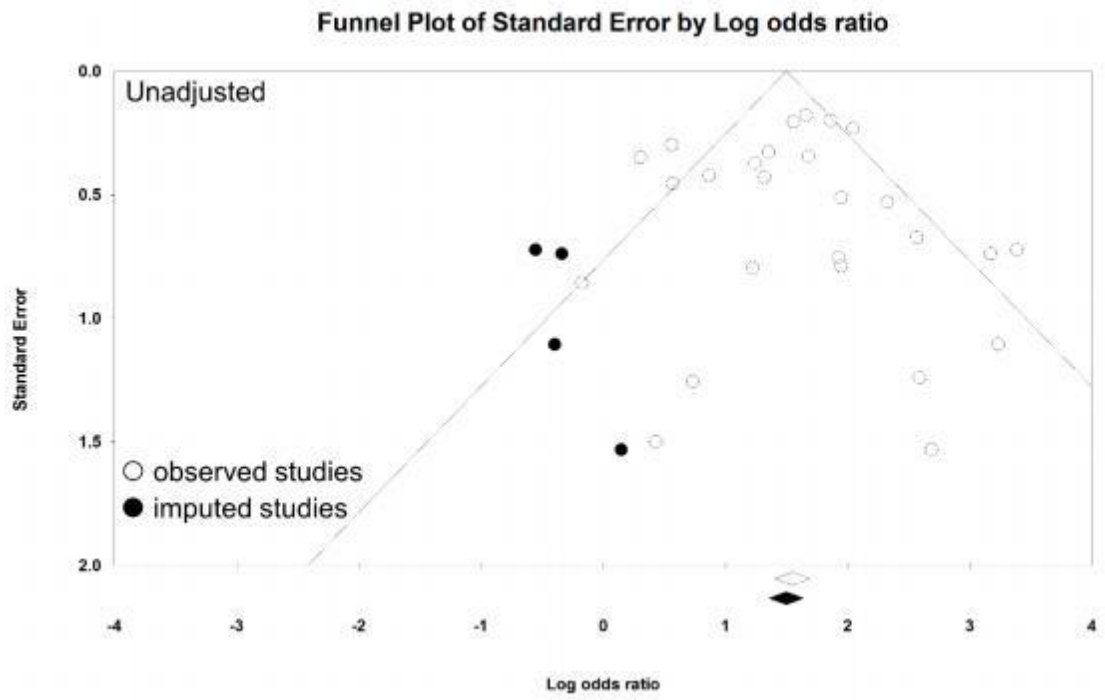

The adjusted pooled odd ratio (OR) was 4.12 with a 95% confidence interval ranging from 3.08-5.50, after simulation of 4 missing study using the trim-and-filled method.

Figure S2 Funnel plot assessing publication bias on hospital stay of post-stroke delirium

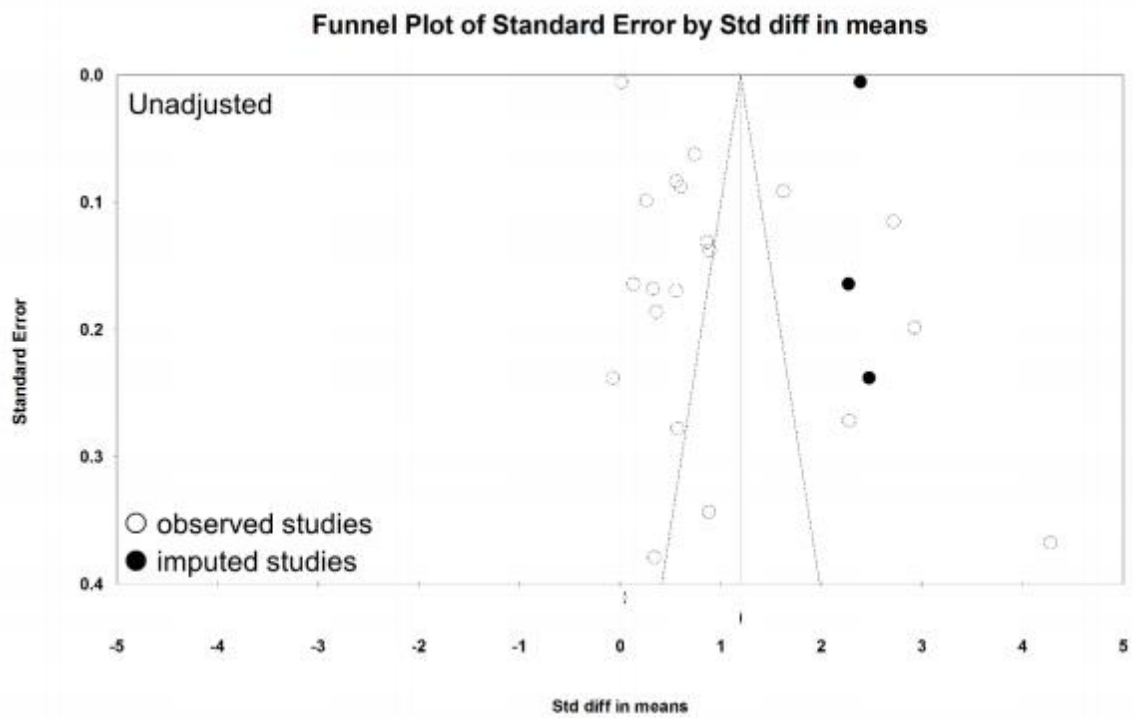

The adjusted pooled odd ratio (OR) was 1.21 with a 95% confidence interval ranging from 0.54-1.89, after simulation of 3 missing study using the trim-and-filled method.



Figure S4 Funnel plot assessing publication bias on cognitive outcomes of post-stroke delirium

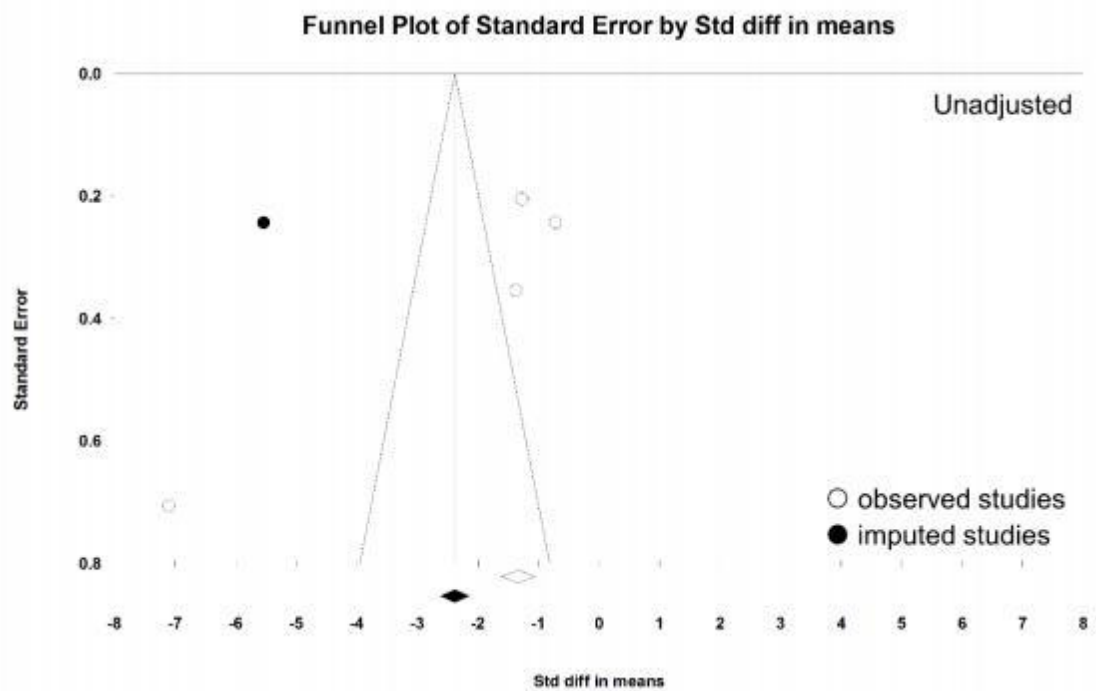

The adjusted pooled odd ratio (OR) was -3.15 with a 95% confidence interval ranging from -5.30 to -0.99, after simulation of 1 missing study using the trim-and-filled method.

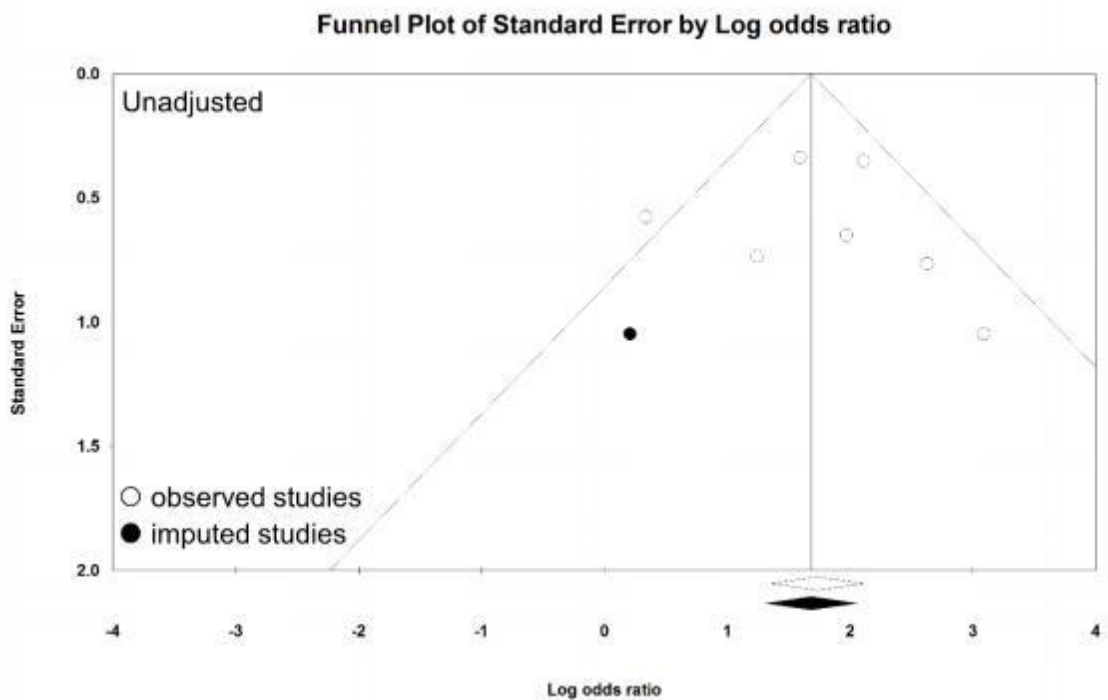

The adjusted pooled standardized mean difference (SMD) was 5.19 with a 95% confidence interval ranging from 2.96-9.10, after simulation of 1 missing study using the trim-and-filled method.

Figure S5 Funnel plot assessing publication bias on dementia of post-stroke delirium

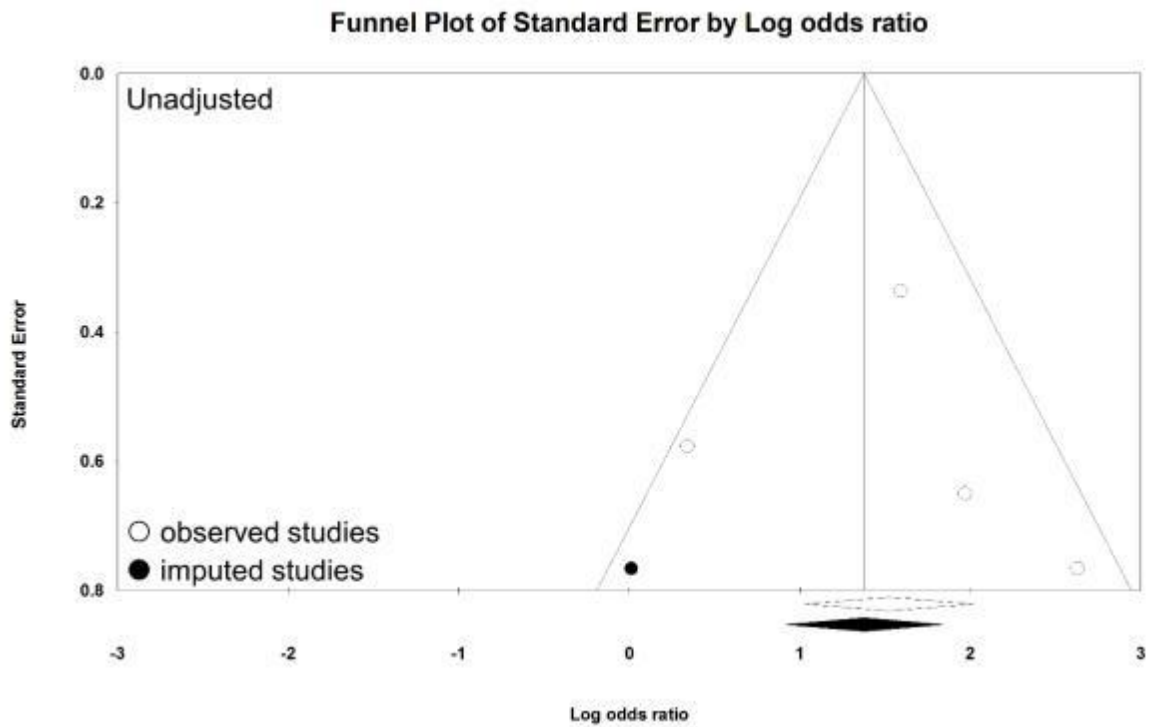

The adjusted pooled odd ratio (OR) was 3.73 with a 95% confidence interval ranging from 1.63-8.54, after simulation of 1 missing study using the trim-and-filled method.

Figure S6 Funnel plot assessing publication bias on functional outcomes of post-stroke delirium

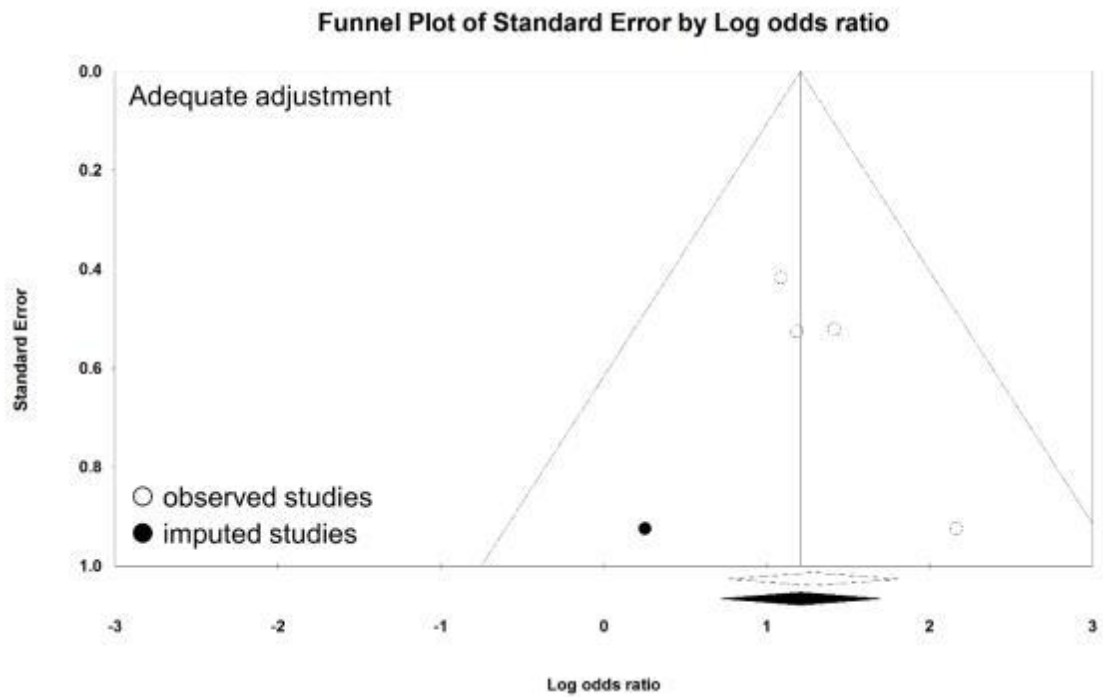

The adjusted pooled odd ratio (OR) was 3.35 with a 95% confidence interval ranging from 2.03-5.52, after simulation of 1 missing study using the trim-and-filled method.

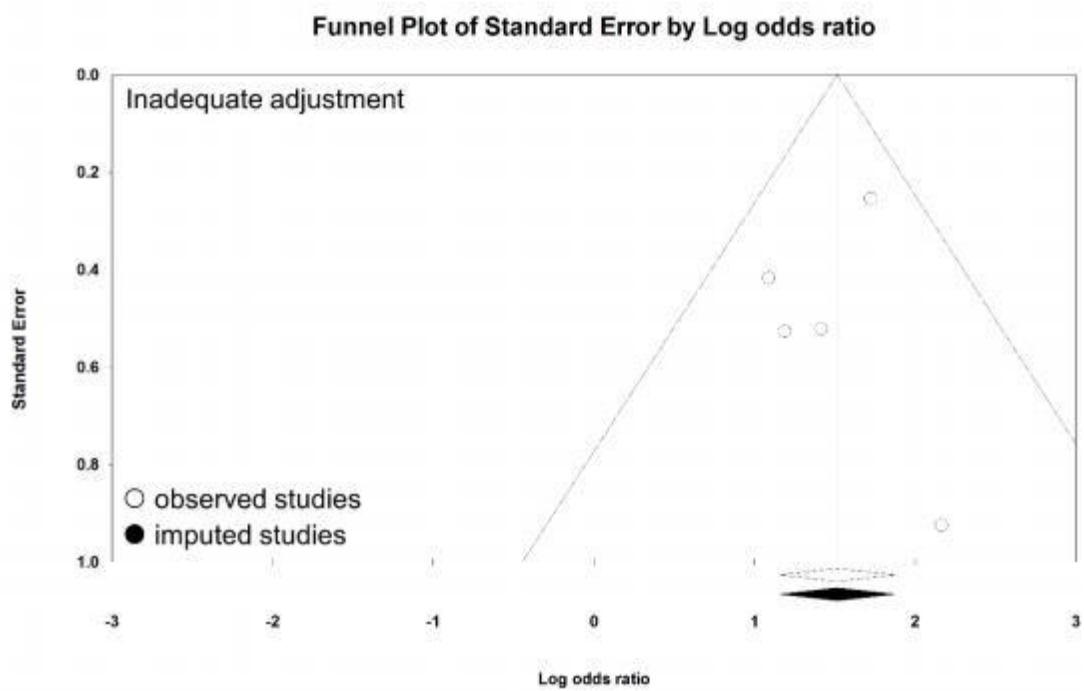

Funnel Plot of Standard Error by Std diff in means

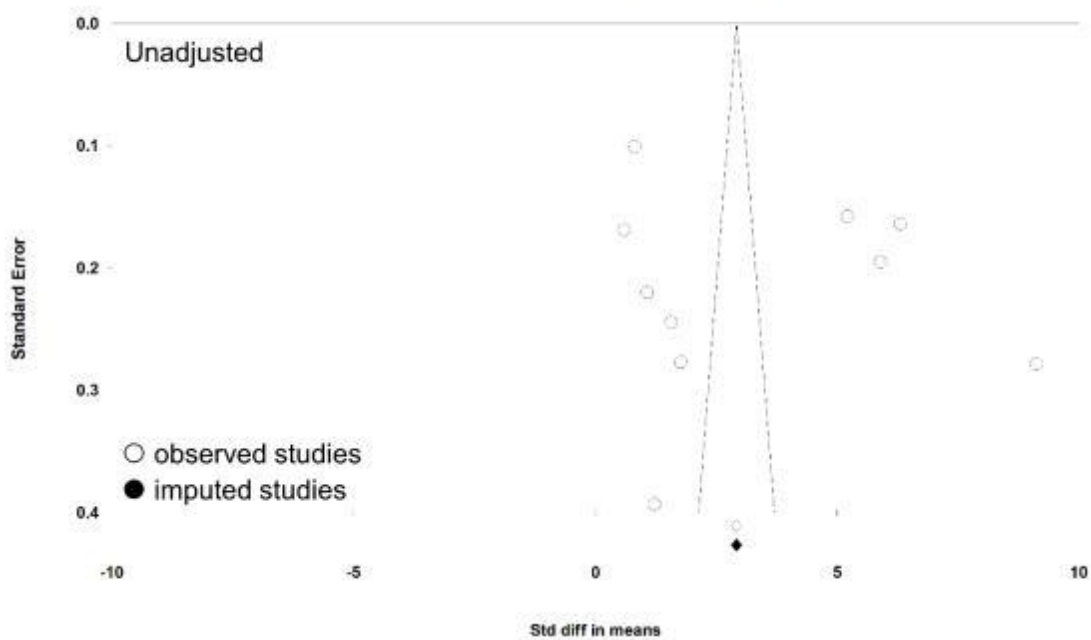

Funnel Plot of Standard Error by Log odds ratio

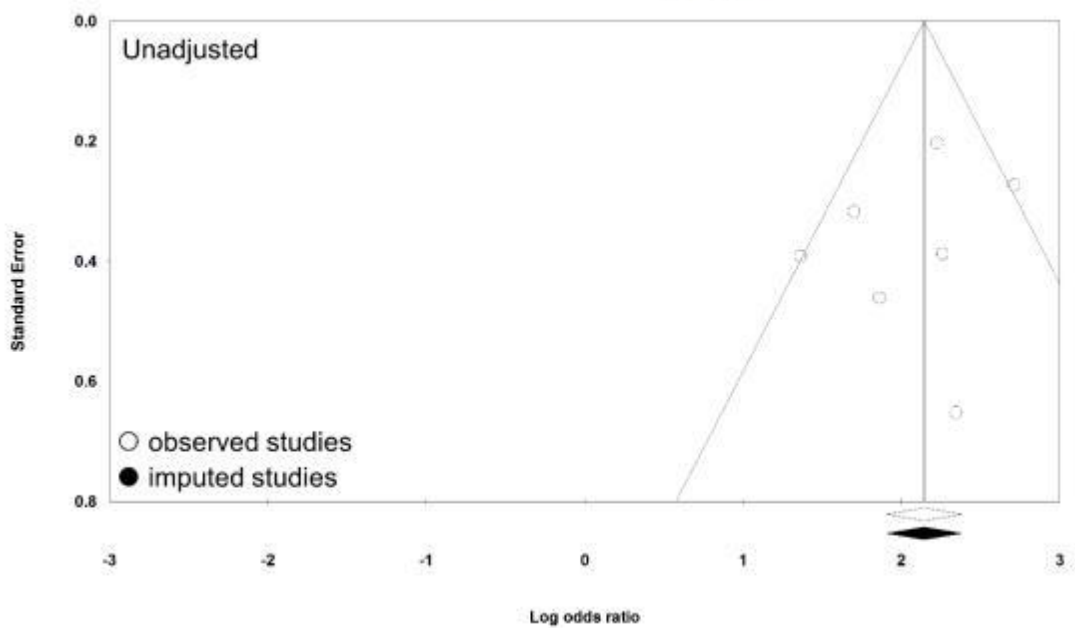



Figure S7 Funnel plot assessing publication bias on life quality of post-stroke delirium

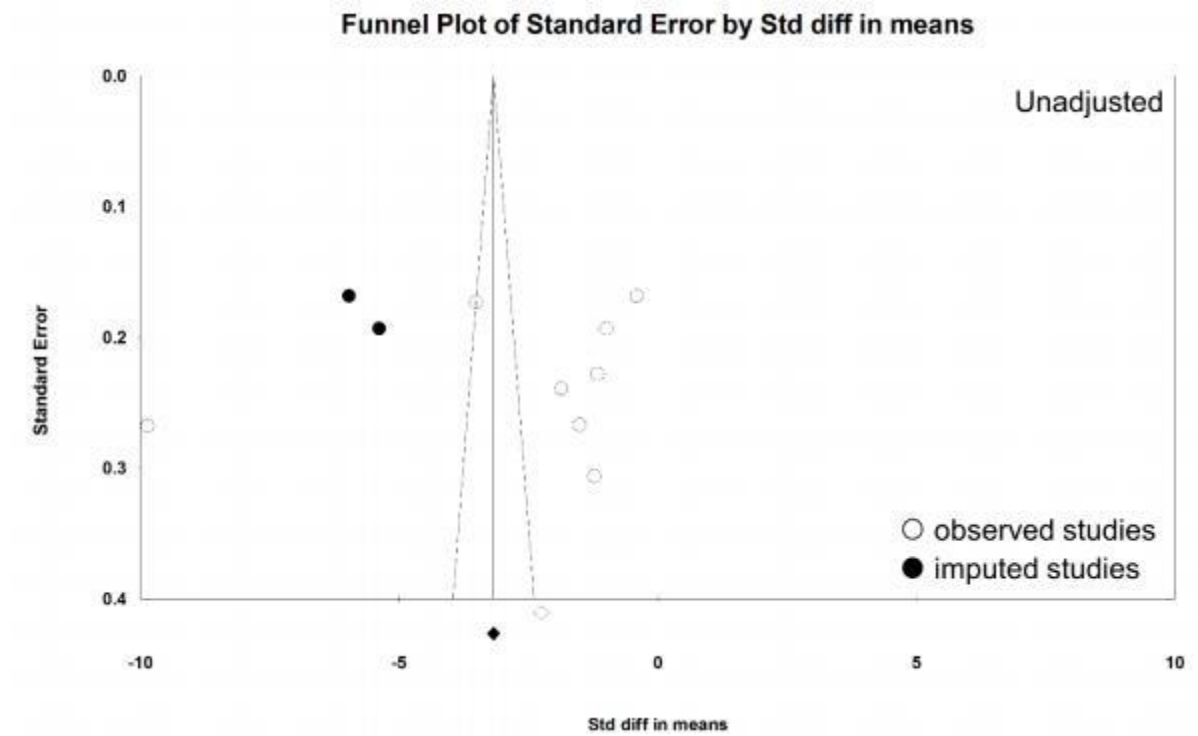

The adjusted pooled standardized mean difference (SMD) was -3.19 with a 95% confidence interval ranging from -4.93 to -1.45, after simulation of 1 missing study using the trim-and-filled method.
